# Supplementary material for: Association between Preoperative Glucose Dysregulation and Delirium after Non-Cardiac Surgery
Source: MDPI journal article supplement (doi:10.3390/jcm13040932), 2024-02-06
Supplement: s1 [file s1]

|               |                      |                      |                    |                      |                      |                      |
|---------------|----------------------|----------------------|--------------------|----------------------|----------------------|----------------------|
| Hyperglycemia | 5108/53508<br>(9.5)  | 0.37 (0.37-<br>0.37) | 994/5426<br>(18.3) | 0.80 (0.79-<br>0.80) | 2.12 (1.98-<br>2.27) | 1.33 (1.22-<br>1.45) |
| Hypoglycemia  | 5939/57560<br>(10.3) | 0.41 (0.41-<br>0.41) | 163/1374<br>(11.9) | 0.47 (0.47-<br>0.48) | 1.17 (1.00-<br>1.36) | 0.89 (0.74-<br>1.07) |
| Both          | 6070/58797<br>(10.3) | 0.41 (0.41-<br>0.41) | 32/137<br>(23.4)   | 0.96 (0.93-<br>1.00) | 2.38 (1.68-<br>3.36) | 1.24 (0.69-<br>2.24) |

**Table S2.** Baseline characteristics according to presence of preoperative hyperglycemia before and after inverse probability of weighting (IPW) adjustment.

|                                       | Unexposed<br>(N=55,954) | Exposed<br>(N=5,851) | ASD        |           |
|---------------------------------------|-------------------------|----------------------|------------|-----------|
|                                       |                         |                      | Before IPW | After IPW |
| Male                                  | 29375 (52.5)            | 3430 (58.6)          | 12.3       | 2.3       |
| Age                                   | 57.4 (±14.7)            | 60.9 (±13.3)         | 24.9       | 3.8       |
| Body mass index                       | 24.4 (±3.7)             | 24.3 (±2.2)          | 3.2        | 0.9       |
| Psychiatric disorder, any             | 2446 (4.4)              | 425 (7.3)            | 12.4       | 0.6       |
| Mood disorder                         | 1085 (1.9)              | 162 (2.8)            | 5.5        | 2.1       |
| Schizophrenia                         | 69 (0.1)                | 15 (0.3)             | 3.1        | 0.2       |
| Alcoholic use disorder                | 64 (0.1)                | 11 (0.2)             | 1.9        | 0.8       |
| Other substance abuse                 | 14 (0.0)                | 4 (0.1)              | 2          | <0.1      |
| Sleep disorder                        | 831 (1.5)               | 118 (2.0)            | 4.1        | 0.3       |
| Personality disorder                  | 18 (0.0)                | 4 (0.1)              | 1.6        | 0.7       |
| Current alcohol                       | 10461 (18.7)            | 946 (16.2)           | 6.7        | 1.1       |
| Current smoking                       | 4891 (8.7)              | 498 (8.5)            | 0.8        | 1.2       |
| Previous disease                      |                         |                      |            |           |
| Hypertension                          | 21242 (38.0)            | 2679 (45.8)          | 15.9       | 2.9       |
| Diabetes                              | 18452 (33.0)            | 3133 (53.5)          | 42.4       | 1.8       |
| Chronic kidney disease                | 1954 (3.5)              | 409 (7.0)            | 15.7       | 2.1       |
| Dialysis                              | 634 (1.1)               | 161 (2.8)            | 11.7       | 1.9       |
| Stroke                                | 2028 (3.6)              | 406 (6.9)            | 14.9       | 1.3       |
| Coronary artery disease               | 1988 (3.6)              | 280 (4.8)            | 6.2        | 1         |
| Heart failure                         | 377 (0.7)               | 62 (1.1)             | 4.2        | 1.6       |
| Arrhythmia                            | 1393 (2.5)              | 195 (3.3)            | 5          | 1         |
| Peripheral artery disease             | 333 (0.6)               | 69 (1.2)             | 6.2        | 0.5       |
| Aortic disease                        | 362 (0.6)               | 38 (0.6)             | <0.1       | 2.3       |
| Valvular heart disease                | 125 (0.2)               | 20 (0.3)             | 2.2        | 0.1       |
| Chronic obstructive pulmonary disease | 1409 (2.5)              | 148 (2.5)            | 0.1        | 0.4       |
| Preoperative blood laboratory tests   |                         |                      |            |           |
| Hemoglobin, g/dl                      | 13.1 (±1.9)             | 12.7 (±2.2)          | 22.1       | 4.1       |
| Creatinine, mg/dL                     | 1.0 (±1.3)              | 1.2 (±1.5)           | 14         | 2.8       |
| Preoperative electrolytes             |                         |                      |            |           |
| Hyponatremia                          | 2909 (5.2)              | 789 (13.5)           | 28.8       | 3.1       |

|                                    |                      |                      |      |     |
|------------------------------------|----------------------|----------------------|------|-----|
| Hypernatremia                      | 500 (0.9)            | 119 (2.0)            | 9.5  | 0.6 |
| Hypokalemia                        | 1147 (2.0)           | 288 (4.9)            | 15.7 | 1   |
| Hyperkalemia                       | 702 (1.3)            | 146 (2.5)            | 7.2  | 1   |
| Hypophosphatemia                   | 1773 (3.2)           | 405 (6.9)            | 17.2 | 1.9 |
| Hyperphosphatemia                  | 2250 (4.0)           | 310 (5.3)            | 6.1  | 1   |
| Hypochloremia                      | 1751 (3.1)           | 506 (8.6)            | 23.6 | 3.2 |
| Hyperchloremia                     | 9457 (16.9)          | 942 (16.1)           | 2.2  | 1.9 |
| Operative variables                |                      |                      |      |     |
| General anesthesia                 | 50234 (89.8)         | 5186 (88.6)          | 3.7  | 2.8 |
| Emergency operation                | 6702 (12.0)          | 2030 (34.7)          | 55.8 | 0.1 |
| Operation duration, min            | 170.2 ( $\pm$ 124.9) | 149.8 ( $\pm$ 115.7) | 14   | 2.9 |
| Intraoperative transfusion         | 4243 (7.6)           | 696 (11.9)           | 14.6 | 3.4 |
| Intraoperative inotropics infusion | 7736 (13.9)          | 619 (10.6)           | 10.1 | 0.4 |
| Surgical risk                      |                      |                      |      |     |
| Mild                               | 11741 (21.0)         | 1190 (20.3)          | 1.6  | 4.9 |
| Intermediate                       | 36450 (65.1)         | 4042 (69.1)          | 8.4  | 3.4 |
| High                               | 7763 (13.9)          | 619 (10.6)           | 10.1 | 1.1 |
| Surgery types                      |                      |                      | 31.4 |     |
| Neuroendocrine                     | 1244 (2.2)           | 81 (1.4)             |      |     |
| Lung                               | 2759 (4.9)           | 533 (9.1)            |      |     |
| Head & Neck                        | 11956 (21.4)         | 1410 (24.1)          |      |     |
| Breast                             | 1274 (2.3)           | 128 (2.2)            |      |     |
| Stomach                            | 2694 (4.8)           | 239 (4.1)            |      |     |
| Hepatobiliary                      | 8371 (15.0)          | 859 (14.7)           |      |     |
| Colorectal                         | 4373 (7.8)           | 550 (9.4)            |      |     |
| Urology                            | 5836 (10.4)          | 390 (6.7)            |      |     |
| Gynecology                         | 3755 (6.7)           | 137 (2.3)            |      |     |
| Bone & Skin etc                    | 13692 (24.5)         | 1524 (26.0)          |      |     |

**Table S3.** Baseline characteristics according to presence of preoperative hypoglycemia before and after inverse probability of weighting (IPW) adjustment.

|                           | Unexposed<br>(N=60,353) | Exposed<br>(N=1,452) | ASD        |           |
|---------------------------|-------------------------|----------------------|------------|-----------|
|                           |                         |                      | Before IPW | After IPW |
| Male                      | 32099 (53.2)            | 706 (48.6)           | 9.1        | 1.3       |
| Age                       | 57.8 ( $\pm$ 14.6)      | 58.0 ( $\pm$ 14.7)   | 1.6        | 1.2       |
| Body mass index           | 24.4 ( $\pm$ 3.7)       | 23.9 ( $\pm$ 3.8)    | 14.5       | 2.7       |
| Psychiatric disorder, any | 2793 (4.6)              | 78 (5.4)             | 3.4        | 0.4       |
| Mood disorder             | 1217 (2.0)              | 30 (2.1)             | 0.4        | 0.3       |
| Schizophrenia             | 83 (0.1)                | 1 (0.1)              | 2.1        | 0.3       |
| Alcoholic use disorder    | 72 (0.1)                | 3 (0.2)              | 2.2        | 0.4       |
| Other substance abuse     | 18 (0.0)                | 0                    | 2.4        | 2.4       |

|                                       |                |                |      |      |
|---------------------------------------|----------------|----------------|------|------|
| Sleep disorder                        | 923 (1.5)      | 26 (1.8)       | 2    | 0.3  |
| Personality disorder                  | 22 (0.0)       | 0              | 2.7  | 2.7  |
| Current alcohol                       | 11194 (18.5)   | 213 (14.7)     | 10.4 | 1.2  |
| Current smoking                       | 5262 (8.7)     | 127 (8.7)      | 0.1  | 0.2  |
| Previous disease                      |                |                |      |      |
| Hypertension                          | 23312 (38.6)   | 609 (41.9)     | 6.8  | 0.6  |
| Diabetes                              | 20759 (34.4)   | 826 (56.9)     | 46.4 | 0.8  |
| Chronic kidney disease                | 2222 (3.7)     | 141 (9.7)      | 24.3 | 3.7  |
| Dialysis                              | 703 (1.2)      | 92 (6.3)       | 27.5 | 1    |
| Stroke                                | 2370 (3.9)     | 64 (4.4)       | 2.4  | 0.7  |
| Coronary artery disease               | 2199 (3.6)     | 69 (4.8)       | 5.5  | 1.3  |
| Heart failure                         | 416 (0.7)      | 23 (1.6)       | 8.4  | 0.3  |
| Arrhythmia                            | 1546 (2.6)     | 42 (2.9)       | 2    | 0.5  |
| Peripheral artery disease             | 391 (0.6)      | 11 (0.8)       | 1.3  | 2.6  |
| Aortic disease                        | 392 (0.6)      | 8 (0.6)        | 1.3  | 1.4  |
| Valvular heart disease                | 144 (0.2)      | 1 (0.1)        | 4.3  | 5    |
| Chronic obstructive pulmonary disease | 1527 (2.5)     | 30 (2.1)       | 3.1  | 2.4  |
| Preoperative blood laboratory tests   |                |                |      |      |
| Hemoglobin, g/dl                      | 13.1 (±2.0)    | 12.3 (±1.9)    | 38.9 | 6.1  |
| Creatinine, mg/dL                     | 1.0 (±1.3)     | 1.6 (±2.3)     | 29.5 | 3.5  |
| Preoperative electrolytes             |                |                |      |      |
| Hyponatremia                          | 3562 (5.9)     | 136 (9.4)      | 13.1 | 1.3  |
| Hypernatremia                         | 602 (1.0)      | 17 (1.2)       | 1.7  | 2.3  |
| Hypokalemia                           | 1397 (2.3)     | 38 (2.6)       | 1.9  | 0.4  |
| Hyperkalemia                          | 765 (1.3)      | 83 (5.7)       | 24.4 | 0.2  |
| Hypophosphatemia                      | 2118 (3.5)     | 60 (4.1)       | 3.2  | 3.6  |
| Hyperphosphatemia                     | 2431 (4.0)     | 129 (8.9)      | 19.9 | 1.7  |
| Hypochloremia                         | 2165 (3.6)     | 92 (6.3)       | 12.7 | 2.5  |
| Hyperchloremia                        | 10118 (16.8)   | 281 (19.4)     | 6.7  | 0.3  |
| Operative variables                   |                |                |      |      |
| General anesthesia                    | 54161 (89.7)   | 1259 (86.7)    | 9.4  | 0.4  |
| Emergency operation                   | 8494 (14.1)    | 238 (16.4)     | 6.5  | 5.5  |
| Operation duration, min               | 168.3 (±124.4) | 168.5 (±114.0) | 0.2  | <0.1 |
| Intraoperative transfusion            | 4747 (7.9)     | 192 (13.2)     | 17.5 | 0.1  |
| Intraoperative inotropics infusion    | 8706 (14.4)    | 317 (21.8)     | 19.3 | 0.9  |
| Surgical risk                         |                |                |      |      |
| Mild                                  | 12677 (21.0)   | 254 (17.5)     | 8.9  | 2.9  |
| Intermediate                          | 39557 (65.5)   | 935 (64.4)     | 2.4  | 3.7  |
| High                                  | 8119 (13.5)    | 263 (18.1)     | 12.8 | 1.8  |
| Surgery types                         |                |                | 25.7 |      |
| Neuroendocrine                        | 1297 (2.1)     | 28 (1.9)       |      |      |

|                 |              |            |
|-----------------|--------------|------------|
| Lung            | 3242 (5.4)   | 50 (3.4)   |
| Head & Neck     | 13102 (21.7) | 264 (18.2) |
| Breast          | 1385 (2.3)   | 17 (1.2)   |
| Stomach         | 2866 (4.7)   | 67 (4.6)   |
| Hepatobiliary   | 8989 (14.9)  | 241 (16.6) |
| Colorectal      | 4811 (8.0)   | 112 (7.7)  |
| Urology         | 6032 (10.0)  | 194 (13.4) |
| Gynecology      | 3731 (6.2)   | 161 (11.1) |
| Bone & Skin etc | 14898 (24.7) | 318 (21.9) |

**Table S4.** Baseline characteristics according to presence of both hyper- and hypoglycemia before and after inverse probability of weighting (IPW) adjustment.

|                                       | Unexposed<br>(N=61,660) | Exposed<br>(N=145) | ASD        |           |
|---------------------------------------|-------------------------|--------------------|------------|-----------|
|                                       |                         |                    | Before IPW | After IPW |
| Male                                  | 32722 (53.1)            | 83 (57.2)          | 8.4        | 2.8       |
| Age                                   | 57.8 ( $\pm$ 14.6)      | 61.6 ( $\pm$ 12.8) | 28.1       | 7.7       |
| Body mass index                       | 24.4 ( $\pm$ 3.7)       | 22.6 ( $\pm$ 3.4)  | 49.4       | 4         |
| Psychiatric disorder, any             | 2863 (4.6)              | 8 (5.5)            | 4          | 4.8       |
| Mood disorder                         | 1246 (2.0)              | 1 (0.7)            | 11.5       | 8.9       |
| Schizophrenia                         | 84 (0.1)                | 0                  | 5.2        | 5.2       |
| Alcoholic use disorder                | 75 (0.1)                | 0                  | 4.9        | 4.9       |
| Other substance abuse                 | 18 (0.0)                | 0                  | 2.4        | 2.4       |
| Sleep disorder                        | 947 (1.5)               | 2 (1.4)            | 1.3        | 3.6       |
| Personality disorder                  | 22 (0.0)                | 0                  | 2.7        | 2.7       |
| Current alcohol                       | 11389 (18.5)            | 18 (12.4)          | 16.8       | 9.9       |
| Current smoking                       | 5380 (8.7)              | 9 (6.2)            | 9.6        | 8.9       |
| Previous disease                      |                         |                    |            |           |
| Hypertension                          | 23847 (38.7)            | 74 (51.0)          | 25         | 3.6       |
| Diabetes                              | 21469 (34.8)            | 116 (80.0)         | >99        | 6.9       |
| Chronic kidney disease                | 2336 (3.8)              | 27 (18.6)          | 48.4       | 7.3       |
| Dialysis                              | 781 (1.3)               | 14 (9.7)           | 37.6       | 1.1       |
| Stroke                                | 2421 (3.9)              | 13 (9.0)           | 20.6       | 7.5       |
| Coronary artery disease               | 2261 (3.7)              | 7 (4.8)            | 5.8        | 8.2       |
| Heart failure                         | 435 (0.7)               | 4 (2.8)            | 15.8       | 2.7       |
| Arrhythmia                            | 1579 (2.6)              | 9 (6.2)            | 17.9       | 5.1       |
| Peripheral artery disease             | 399 (0.6)               | 3 (2.1)            | 12.3       | 2.2       |
| Aortic disease                        | 400 (0.6)               | 0                  | 11.4       | 9.5       |
| Valvular heart disease                | 145 (0.2)               | 0                  | 6.9        | 6.9       |
| Chronic obstructive pulmonary disease | 1553 (2.5)              | 4 (2.8)            | 1.5        | 6.1       |
| Preoperative blood laboratory tests   |                         |                    |            |           |
| Hemoglobin, g/dl                      | 13.1 ( $\pm$ 2.0)       | 12.0 ( $\pm$ 2.0)  | 56         | 9.8       |

|                                    |                |                |      |      |
|------------------------------------|----------------|----------------|------|------|
| Creatinine, mg/dL                  | 1.0 (±1.3)     | 2.0 (±2.4)     | 49.1 | 0.6  |
| Preoperative electrolytes          |                |                |      |      |
| Hyponatremia                       | 3678 (6.0)     | 20 (13.8)      | 26.5 | 10.3 |
| Hypernatremia                      | 616 (1.0)      | 3 (2.1)        | 8.7  | 3.7  |
| Hypokalemia                        | 1431 (2.3)     | 4 (2.8)        | 2.8  | 0.6  |
| Hyperkalemia                       | 834 (1.4)      | 14 (9.7)       | 37   | 5.4  |
| Hypophosphatemia                   | 2168 (3.5)     | 10 (6.9)       | 15.3 | 10.2 |
| Hyperphosphatemia                  | 2542 (4.1)     | 18 (12.4)      | 30.5 | 4.8  |
| Hypochloremia                      | 2241 (3.6)     | 16 (11.0)      | 28.7 | 9.2  |
| Hyperchloremia                     | 10371 (16.8)   | 28 (19.3)      | 6.5  | 7.3  |
| Operative variables                |                |                |      |      |
| General anesthesia                 | 55295 (89.7)   | 125 (86.2)     | 10.7 | 10.4 |
| Emergency operation                | 8700 (14.1)    | 32 (22.1)      | 20.8 | 10.2 |
| Operation duration, min            | 168.3 (±124.2) | 157.4 (±117.6) | 9    | 6.5  |
| Intraoperative transfusion         | 4917 (8.0)     | 22 (15.2)      | 22.6 | 5.9  |
| Intraoperative inotropics infusion | 8979 (14.6)    | 44 (30.3)      | 38.5 | 9.7  |
| Surgical risk                      |                |                |      |      |
| Mild                               | 12894 (20.9)   | 37 (25.5)      | 10.9 | 5.8  |
| Intermediate                       | 40409 (65.5)   | 83 (57.2)      | 17.1 | 7.4  |
| High                               | 8357 (13.6)    | 25 (17.2)      | 10.2 | 3.5  |
| Surgery types                      |                |                | 36.6 |      |
| Neuroendocrine                     | 1322 (2.1)     | 3 (2.1)        |      |      |
| Lung                               | 3281 (5.3)     | 11 (7.6)       |      |      |
| Head & Neck                        | 13344 (21.6)   | 22 (15.2)      |      |      |
| Breast                             | 1397 (2.3)     | 5 (3.4)        |      |      |
| Stomach                            | 2925 (4.7)     | 8 (5.5)        |      |      |
| Hepatobiliary                      | 9209(14.9)     | 21 (14.5)      |      |      |
| Colorectal                         | 4919 (8.0)     | 14 (9.7)       |      |      |
| Urology                            | 6203 (10.1)    | 23 (15.9)      |      |      |
| Gynecology                         | 3890 (6.3)     | 2 (1.4)        |      |      |
| Bone & Skin etc                    | 15180 (24.6)   | 36 (24.8)      |      |      |
